# Supplementary material for: Effects of traditional Chinese exercises or their integration with medical treatments on cognitive impairment: a network meta-analysis based on randomized controlled trials
Source: Front Aging Neurosci. 2024 Nov 11;16:1475406. doi: 10.3389/fnagi.2024.1475406 (PMC11586772; doi:10.3389/fnagi.2024.1475406)
Supplement: Supplementary file 2 [file Table_2.xlsx]

## Sheet: MMSE
No.	Author	Year	intervention	Total	Mean	sd	TIME	Course
1	Fuzhong Li	2014	Ystlyle TAI JI QUAN	22	23.09	1.15	Base	14W
			Tai Ji Quan: Moving for Better Balance		26.05	1.21	After treatment
					2.96	1.18114	Change
			control	24	23.17	1.2	Base
					23.79	1.14	After treatment
					0.62	1.17115	Change
2	Aileen WK Chan	2016	control	25	0.94	4.40082	Base	8w
					-1	4.2285	After treatment
					-1.94	4.31724	Change
			Tai chi qigong	27	0.94	4.40082	Base
					2.36	2.95918	After treatment
					1.42	3.88602	Change
3	Yin‑Chou Lin	2012	Tai Chi 6-Form Apparatus	11	17.64	7.42	Base	8w
					19.09	7.56	After treatment
					1.45	7.49098	Change
			control	10	21.2	4.19	Base
					22.1	2.33	After treatment
					0.9	3.63625	Change
4	Jing Tao	2014	mahjong	36	19	3.2	Base	12w
					2.24	5.75051	After treatment
					-16.76	4.99066	Change
			TAIJIQUAN	39	18.7	3.9	Base
					1.617	5.71131	After treatment
					-17.083	5.05519	Change
			control	35	18.9	4.1	Base
							After treatment
							Change
5	Siu, MY (Siu, Mei-yi)	2017	TAI CHI	80	25.46	1.89	Base	16w
					26.74	2.42	After treatment
					1.28	2.20334	Change
			control	80	24.61	2.75	Base
					24.7	2.92	After treatment
					0.09	2.83882	Change
6	Sandy C. Burgener	2008	Y TAI CHI	24	24.8	3.5	Base	40w
					25.2	3.1	After treatment
					0.4	3.31813	Change
			control	19	22.9	5.2	Base
					22.4	7.6	After treatment
					-0.5	6.72904	Change
7	ZHENGXINTUAN	2013	qigong	45	24.82	2.27	Base	24w
					26.03	2.63	After treatment
					1.21	2.46976	Change
			control	43	24.99	2.4	Base
					24.86	2.98	After treatment
					-0.13	2.73649	Change
8	LI RI ZHEN	2013	Naoling decoction and Taijiquan	32	15. 62	5.39	Base	12w
					25.05	7.59	After treatment
					9.43	6.76388	Change
			control	30	15.59	5. 41	Base
					21.12	7. 03	After treatment
					5.53	6.37626	Change
9	CAIJUN	2018	qigong	28	22.8	1.5	Base	24w
					24.3	2.1	After treatment
					1.5	1.8735	Change
			control	30	22.5	1.4	Base
					23	2	After treatment
					0.5	1.77764	Change
10	FENGJINPING	2022	qigong+	47	23.68	2.51	Base	87w
					27.81	1.77	After treatment
					4.13	2.2339	Change
			control	47	23.75	2.64	Base
					26.34	1.86	After treatment
					2.59	2.34921	Change
11	ZHOUYONG	2016	Tai Chi soft ball exercise	20	20.95	1.54	Base
					26.05	1.96	After treatment
					5.1	1.7874	Change
			control	20	20.55	1.23	Base
					16.9	1.55	After treatment
					-3.65	1.41736	Change

## Sheet: MOCA
No.	Author	Year	intervention	Total	Mean	sd	TIME	Course
1	Angus P Yu	2022	TAICHI	10	19.7	1.5	Base	24w
					26.6	1.9	After treatment
					6.9	1.73494	Change
			control	12	18.2	3.8	Base
					18.9	5.2	After treatment
					0.7	4.66047	Change
2	Liu, J (Liu, Jiao)	2021	qigong	20	22.45	2.16	Base	24w
					24.55	2.25	After treatment
					2.1	2.20638	Change
			control	20	21	2.36	Base
					22.1	1.48	After treatment
					1.1	2.06572	Change
3	Xu, Y (Xu, Ying)	2023	Tai Chi combined with tDCS (TCT) group	44	23.5	3	Base	12W
					25	2.83	After treatment
					1.5	2.91872	Change
			Tai Chi combined with sham tDCS (TCS)j	49	22	3	Base
					25	2	After treatment
					3	2.64575	Change
			Walking combined with tDCS (WAT)	44	22.5	3	Base
					24.24	1.61	After treatment
4	Ling-Yun Fan,	2023	Tai Chi Chuan Group	110	21.88	2.77	Base	36W
					24.67	2.72	After treatment
					2.79	2.74534	Change
			Control Group	110	21.34	2.85	Base
					22.77	3.29	After treatment
					1.43	3.09356	Change
5	XiaRui2022	2022	qigong	70	23.51	2.54	Base	24w
					25.99	2.3	After treatment
					2.48	2.42891	Change
			Control Group	65	23.35	22.46	Base
					24.31	2.36	After treatment
					0.96	21.3779	Change
6	Chien-Liang Liu,	2022	EXER-TC	16	22.6	2.5	Base	12W
					24.5	0.38	After treatment
					1.9	2.33332	Change
			Taiji Group	17	21.8	3.6	Base
					23.4	0.38	After treatment
					1.6	3.42584	Change
			Control Group	17	23.2	2.8	Base
					22.7	0.39	After treatment
					-0.5	2.6268	Change
7	SHENZEYU	2021	Acupuncture and Tai Chi	31	22.61	1.15	Base	8w
					25.71	1.95	After treatment
					3.1	1.69779	Change
			control ：only Tai Chi	31	22.23	1.45	Base
					23.35	2.55	After treatment
					1.12	2.21529	Change
8	QIAN	2019	qigong	32	22.17	1.34	Base	24w
					26.47	1.22	After treatment
					4.3	1.28421	Change
			Control Group	32	21.73	1.46	Base
					21.13	1.17	After treatment
					-0.6	1.33877	Change	24w
9	ZHENGXINTUAN	2013	qigong	45	22.76	5.14	Base
					25.18	5.07	After treatment
					2.42	5.10536	Change
			Control Group	43	22.86	4.23	Base
					22.83	4.95	After treatment
					-0.03	4.63216	Change
10	SUNZHICHENG	2021	qigong	29	20.18	3.22	Base	24w
					24.56	2.24	After treatment
					4.38	2.85888	Change
			Control Group	28	20.31	3.36	Base
					21.07	2.01	After treatment
					0.76	2.9285	Change
11	CAIJUN	2018	qigong	28	22.3	1.7	Base	24w
					24.1	2.6	After treatment
					1.8	2.28692	Change
			Control Group	30	22.9	2.2	Base
					22.9	2.1	After treatment
					0	2.15174	Change
12	Huang Meiling	2021	TAICHI	33	21	5.8618	Base	24w
					24	4.39635	After treatment
					3	5.28375	Change
			Control Group	33	21	3.29726	Base
					21	4.76271	After treatment
					0	4.2251	Change
13	Feng jinping	2022	qigong +tDCS	47	22.49	3.116	Base	8w
					26.95	1.83	After treatment
					4.46	2.71221	Change
			contro	47	22.54	3.13	Base
					25.61	1.97	After treatment
					3.07	2.74075	Change	24w
14	LIu tao	2018	Baduanjinqigong	30	19.86	1.86	Base
					23.04	1.55	After treatment
					3.18	1.72601	Change
			Control Group	30	20.12	2.78	Base
					21.93	1.87	After treatment
					1.81	2.45493	Change
15	Zhuang Min	2023	Yangfeifangqigong	18	25.17	2.09	Base	12W
					26.67	2.5	After treatment
					1.5	2.3223	Change
			Control Group	18	24.83	3.37	Base
					24.28	3.43	After treatment
					-0.55	3.4004	Change
16	Liu Hengjia2020	2020	Twelve Dan Jin qigong	28	20.07	1.44	Base	24w
					24.32	1.76	After treatment
					4.25	1.62382	Change
			Control Group	30	20.53	2.57	Base
					21.27	2.85	After treatment
					0.74	2.72083	Change
